# Supplementary material
Source: PubMed Central journal article supplement (PMC6452894)
Supplement: NIHMS1518304-supplement-1.pdf [file NIHMS1518304-supplement-1.pdf]

Consensus:

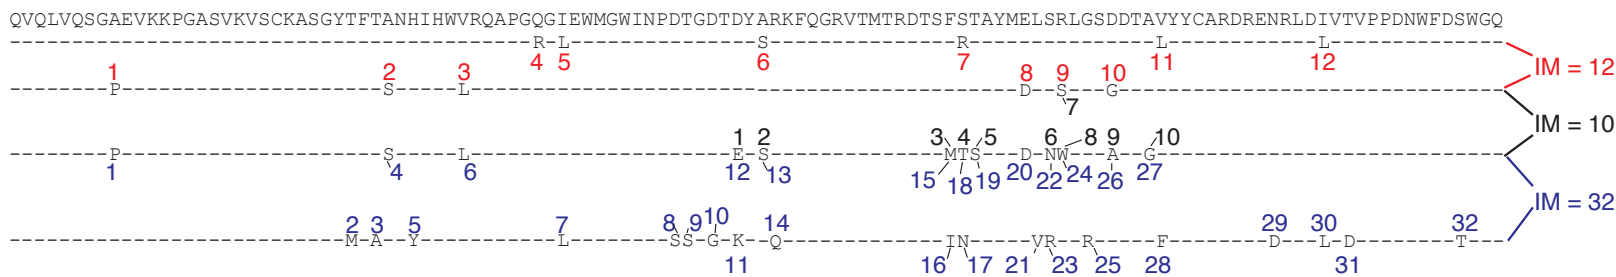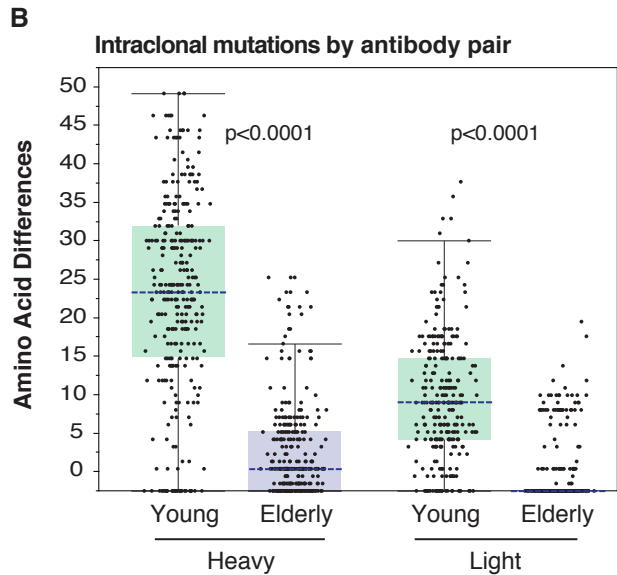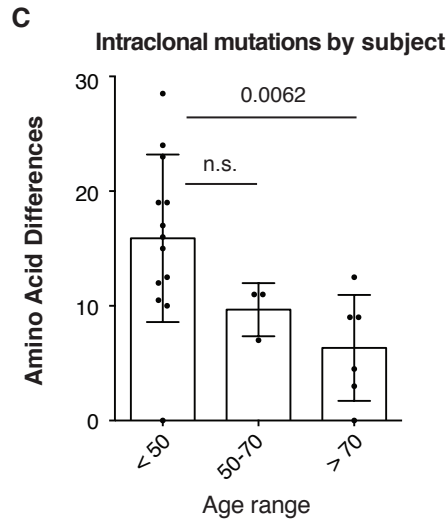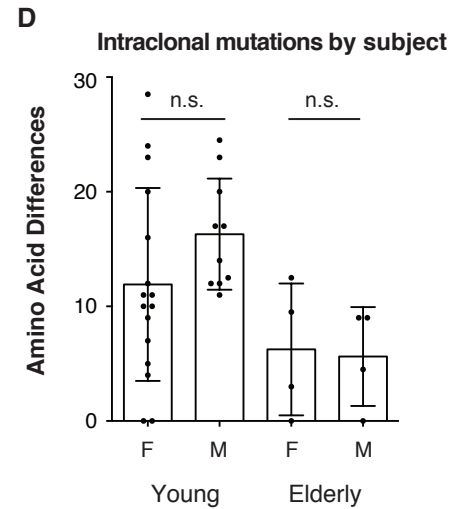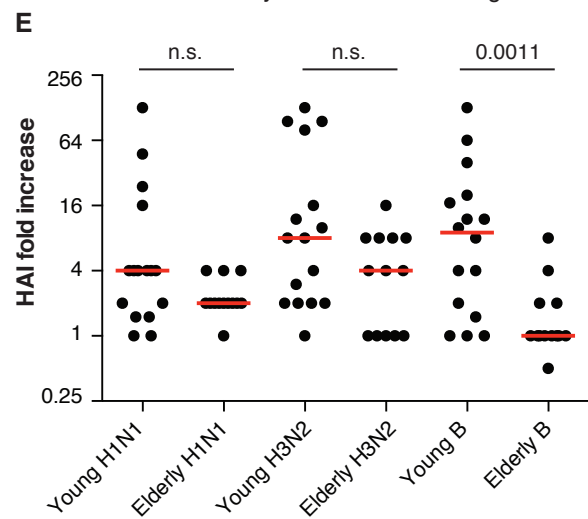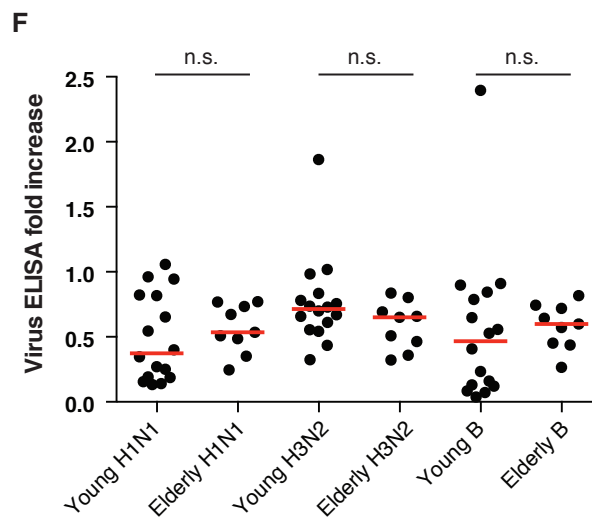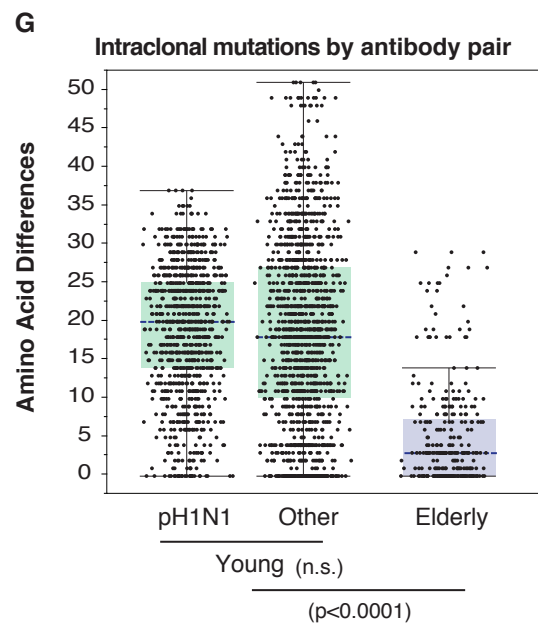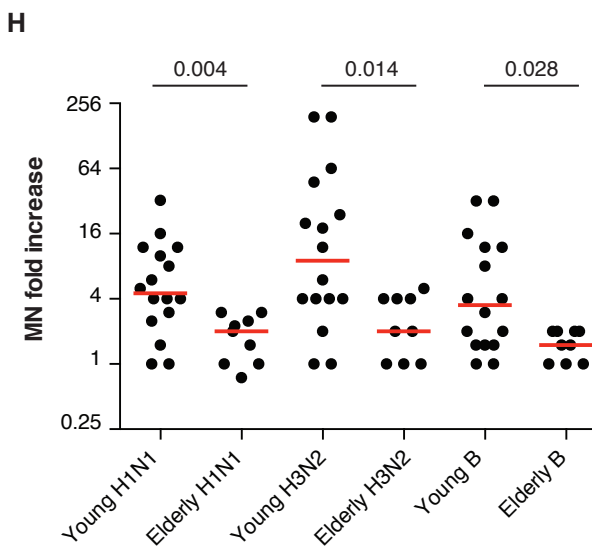

**Figure S1. Reduced potency and capacity to target drifted epitopes by influenza-reactive antibodies from elderly individuals compared to young adults due to lack of de novo mutations, Related to Figures 1 and 3.**

(A) Example of intraclonal diversity analysis between different VH sequences within a clonal lineage.

(B-D) Intraclonal mutations by antibody pair or by subject. Testing for statistical significance was performed using a Mann–Whitney U test. n.s. not significant.

(B) Variable distribution with quartiles is represented for each group and the median is represented as a blue dotted line. Amino-acid differences by antibody pair in each group (young adults n = 2465; aged n = 340) for the heavy and light chains. (C) Amino-acid differences by subject in three age groups: below 50, between 50 and 70 years old and over 70 years old. (D) Amino-acid differences by subject based on gender.

(E) Serum antibody HAI titers in the young cohort (n=16) compared to the elderly cohort (n=13) for H1N1 strains (A/California/07/09 and A/Brisbane/59/2007), H3N2 strains (A/Uruguay/716/2007 and A/Perth/16/2009) and B/Brisbane/60/2008 virus. Each dot represents the fold change increase between d0 and d28 in an individual donor. Medians are represented in red. Testing for statistical significance was performed using a Mann–Whitney U test.

(F) Serum antibody virus ELISA titers in the young cohort (n=16) compared to the elderly cohort (n=9) for H1N1 strains (A/California/07/09 and A/Brisbane/59/2007), H3N2 strains (A/Uruguay/716/2007 and A/Perth/16/2009) and B/Brisbane/60/2008 virus. Each dot represents the fold change increase between d0 and d28 in an individual donor. Medians are represented in red. Testing for statistical significance was performed using a Mann–Whitney U test.

(G) Intraclonal mutations by antibody pair represented as amino-acid differences for the heavy chain of the young cohort in response to seasonal influenza virus vaccination (TIV) compared to the pH1N1 2009 vaccination and compared to the elderly cohort in response to the seasonal TIV.

(H) Serum antibody MN titers in the young cohort (n=16) compared to the elderly cohort (n=9) for H1N1 strains (A/California/07/09 and A/Brisbane/59/2007), H3N2 strains (A/Uruguay/716/2007 and A/Perth/16/2009) and B/Brisbane/60/2008 virus. Each dot represents the fold change increase between d0 and d28 in an individual donor. Medians are represented in red. Testing for statistical significance was performed using a Mann–Whitney U test.

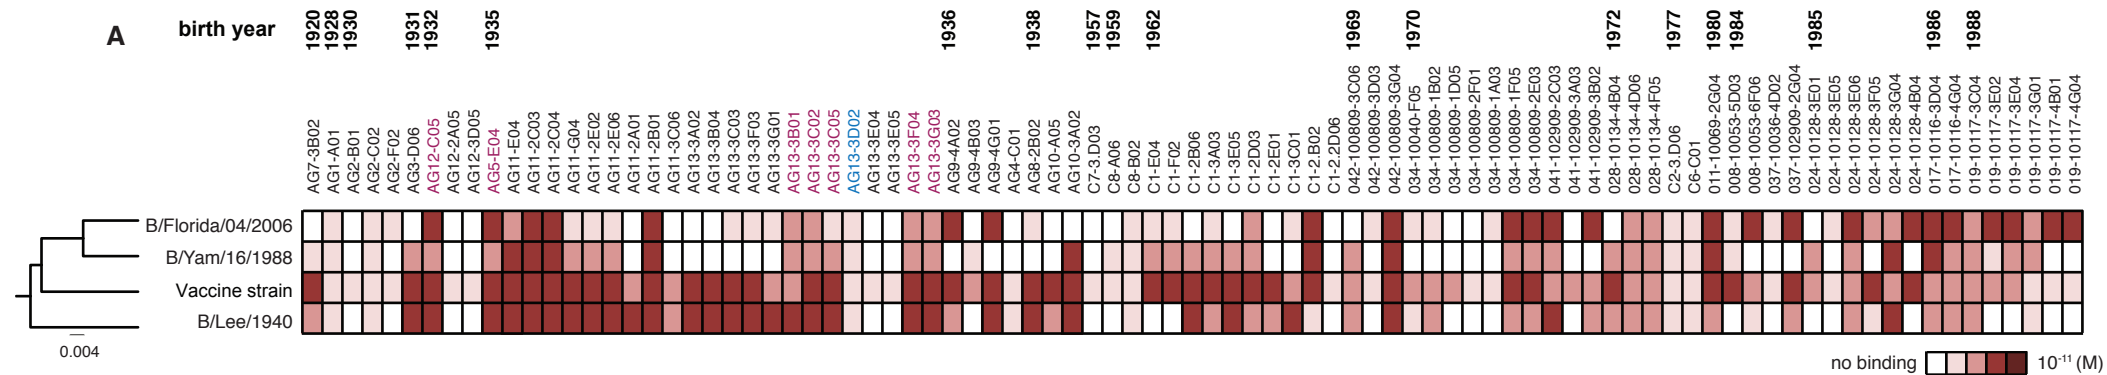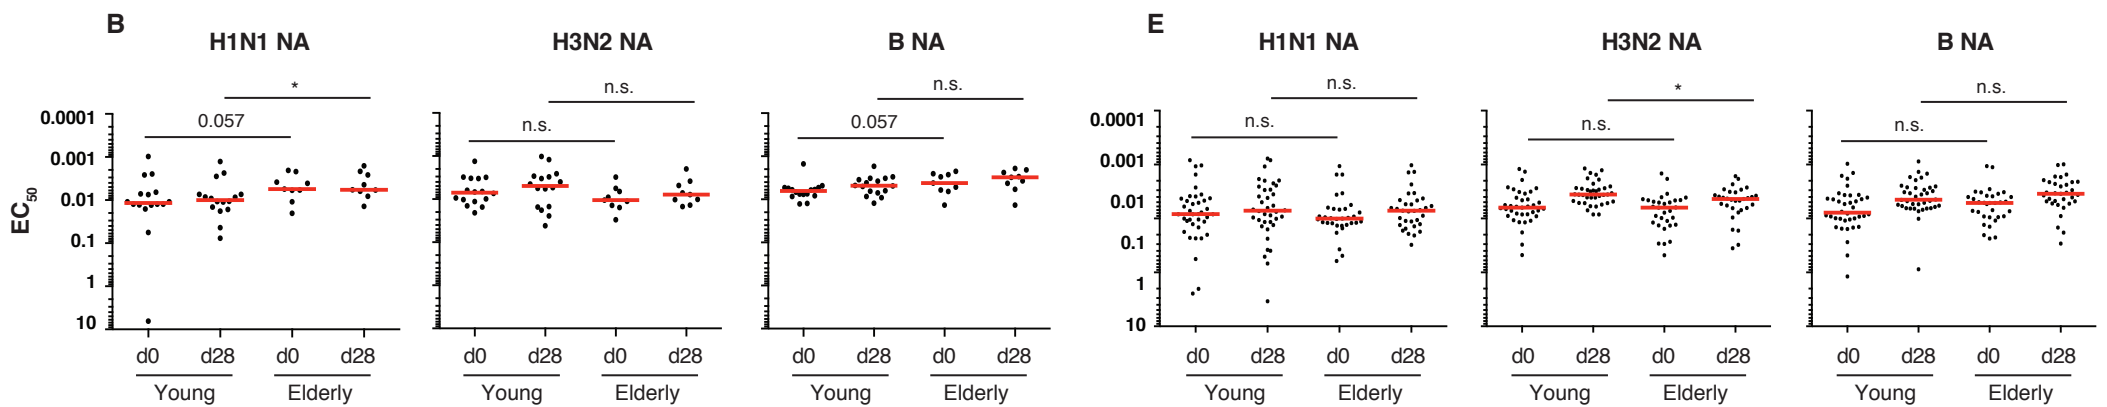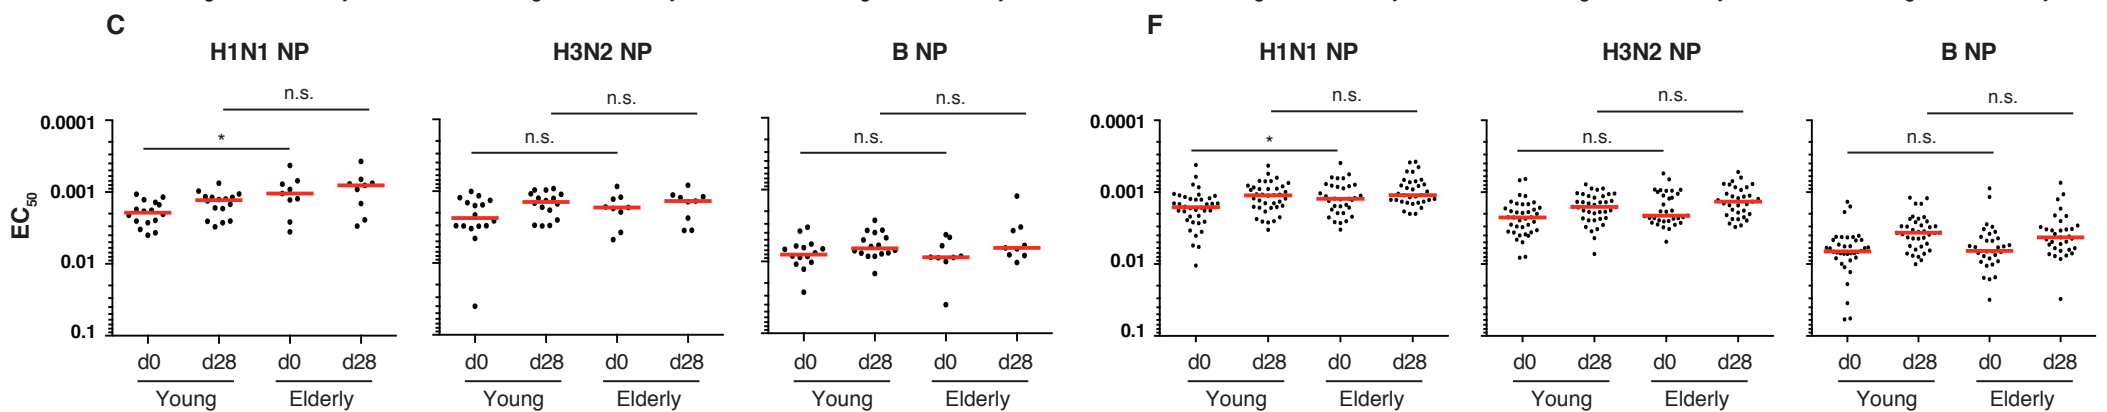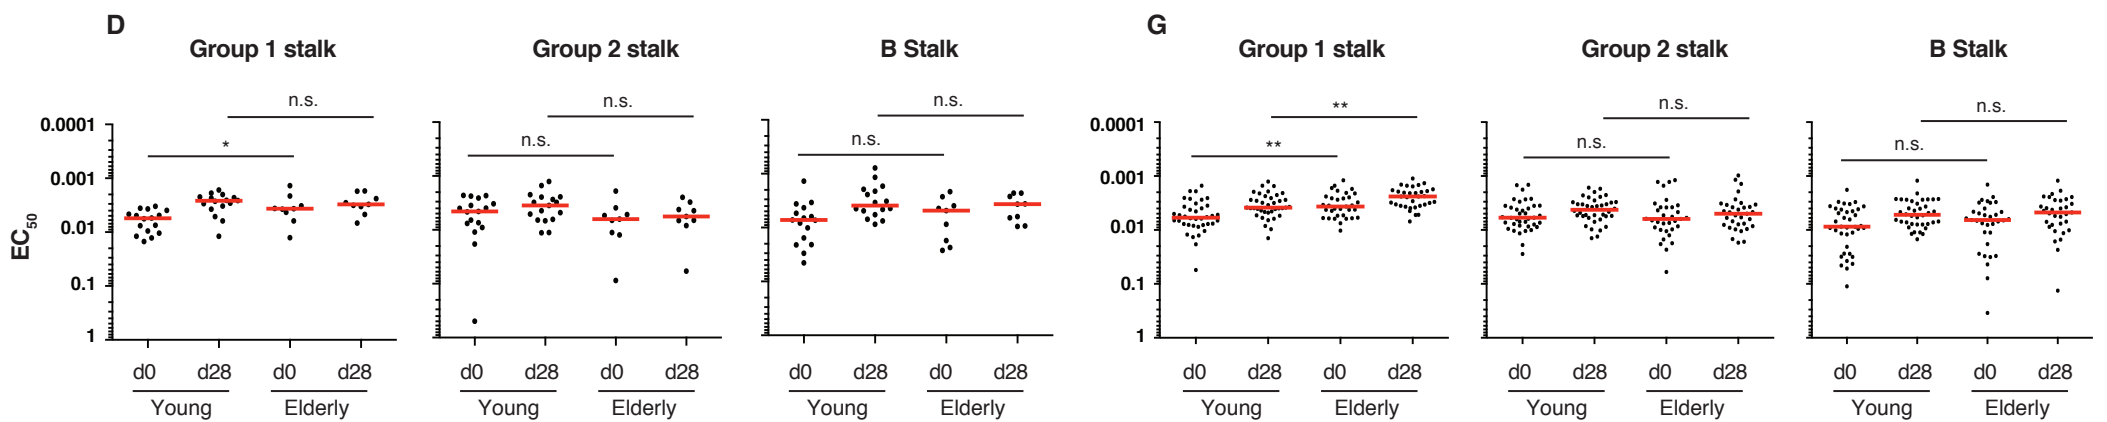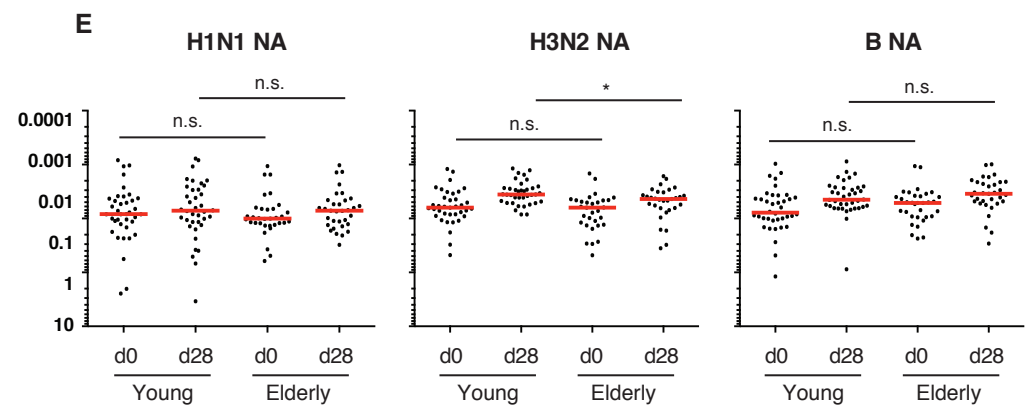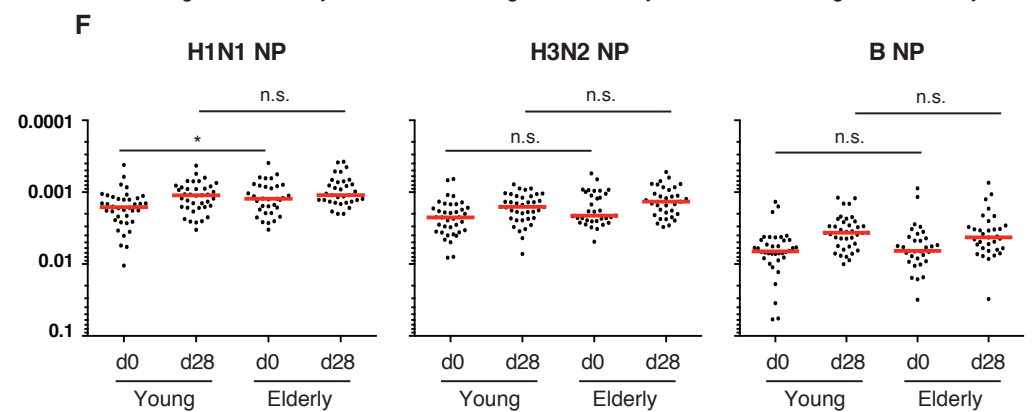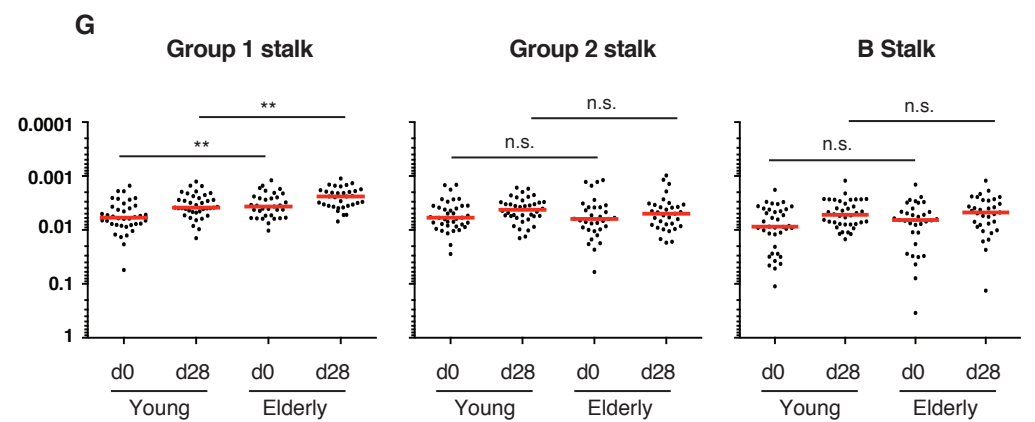

**Figure S2. Influenza-reactive antibodies from elderly individuals target conserved epitopes on HA and on other viral proteins, Related to Figure 3.**

(A) Cross-reactivity to past influenza B strain rHA proteins was tested for both cohorts by ELISA. The assays were performed in duplicate three times for each antibody. ELISA binding affinities represented by  $K_D$  (M) were plotted as a heatmap. The different HAs were clustered by amino acid sequence phylogeny, and multiple alignments were performed using the Clustal Omega algorithm. A rooted tree was constructed using the neighbor-joining method and was visualized using FigTree v1.4.0 software. The antibody in blue cross-reacted to influenza A and B strains. The antibodies in magenta are the MN<sup>+</sup> non-competing but cross-reactive antibodies. Vaccine strains are B/Brisbane/60/2008 and B/Malaysia/2506/2004.

(B-D) Serum antibody titers pre (d0) and post (d28) vaccination to the NA, NP and HA-stalk proteins in the young cohort (n=16) compared to the elderly cohort (n=9). Each dot represents a subject's  $EC_{50}$ . The assays were performed in duplicate twice. Medians are represented in red. Testing for statistical significance was performed using a Mann-Whitney U test. (B) Serum antibody titers to H1N1 NA proteins (A/California/04/09 or A/Brisbane/59/2007), H3N2 A/Wisconsin/57/2005 and B/Brisbane/60/2008 NA proteins. (C) Serum antibody titers to H1N1 NP A/Puerto Rico/8/1934, H3N2 NP A/Aichi/2/1968 and B/Florida/4/2006 NP proteins. (D) Serum antibody titers to group 1 stalk HA (chimeric H6/1 with A/Puerto Rico/8/1934 stalk or cH6/1 with A/California/04/09 stalk), group 2 stalk HA (cH5/3 with A/Perth/16/2009 stalk) and B stalk (cH8/B with B/Florida/4/2006 stalk).

(E-G) Serum antibody titers pre (d0) and post (d28) vaccination to the NA, NP and HA-stalk proteins in additional young (n=38) and elderly (n=33) cohorts. Each dot represents a subject's  $EC_{50}$ . The assays were performed in duplicate twice. Medians are represented in red. Testing for statistical significance was performed using a Mann-Whitney U test. (E) Serum antibody titers to H1N1 A/California/04/09, H3N2 A/Wisconsin/57/2005 or A/Hong-Kong/485197/2014 and B/Brisbane/60/2008 NA proteins. (F) Serum antibody titers to H1N1 NP A/Puerto Rico/8/1934, H3N2 NP A/Aichi/2/1968 and B/Florida/4/2006 NP proteins. (G) Serum antibody titers to group 1 stalk HA (cH6/1 with A/California/04/09 stalk), group 2 stalk HA (cH5/3 with A/Perth/16/2009 stalk) and B stalk (cH8/B with B/Florida/4/2006 stalk).

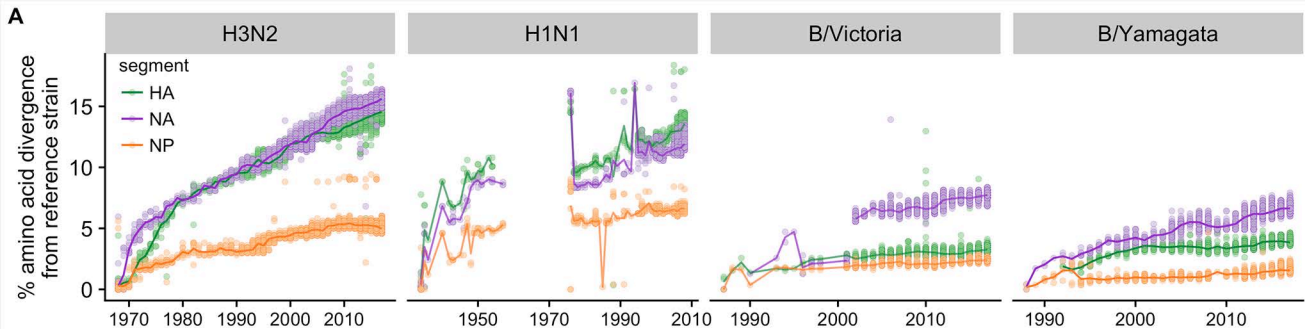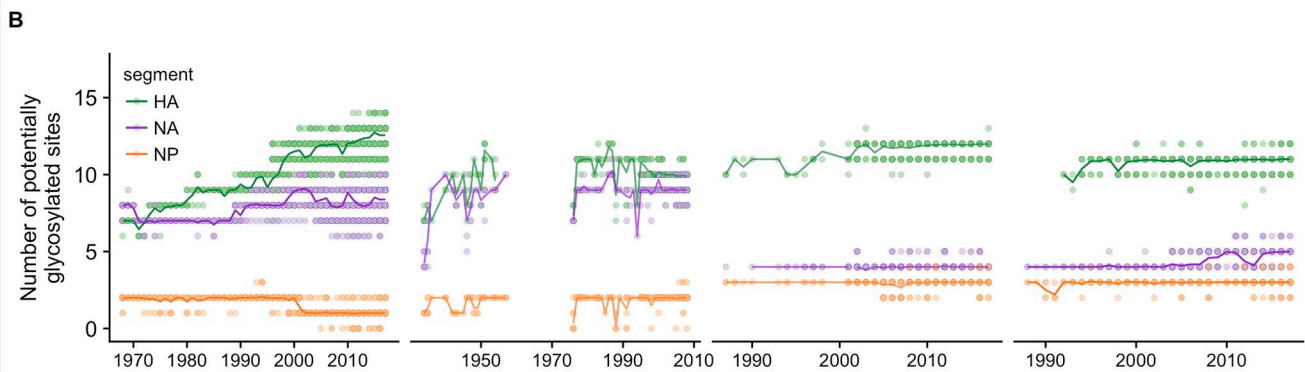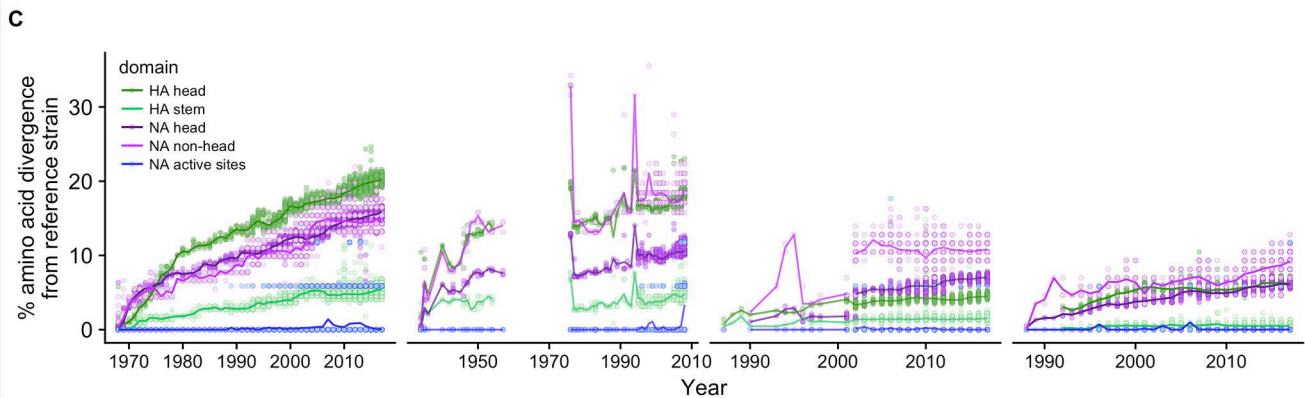

**Figure S3. Evolutionary changes in the hemagglutinin (HA), neuraminidase (NA) and nucleoprotein (NP) segments of influenza A and B viruses, Related to Figures 3 and 4.**

(A) Percent amino acid sequence divergence relative to reference strains A/Hong Kong/01/1968 (H3N2), A/Puerto Rico/8-1/1934 (H1N1), B/Victoria/02/87 (B/Victoria) and B/Yamagata/16/88 (B/Yamagata). (B) Number of potentially N-linked glycosylated sites identified from N-X-[ST]-X motifs, where X is any amino acid except proline. (C) Percent amino acid divergence over time for different domains of HA and NA. Analyses were based on complete sequences for the protein coding regions of each segment isolated until 2017 and obtained from the NCBI Influenza Virus Database. Lines indicate per-year means. The discontinuity in the B/Victoria NA corresponds to acquisition of a Yamagata-lineage NA by Victoria viruses through reassortment in the early 2000s (Langat et al., 2017).

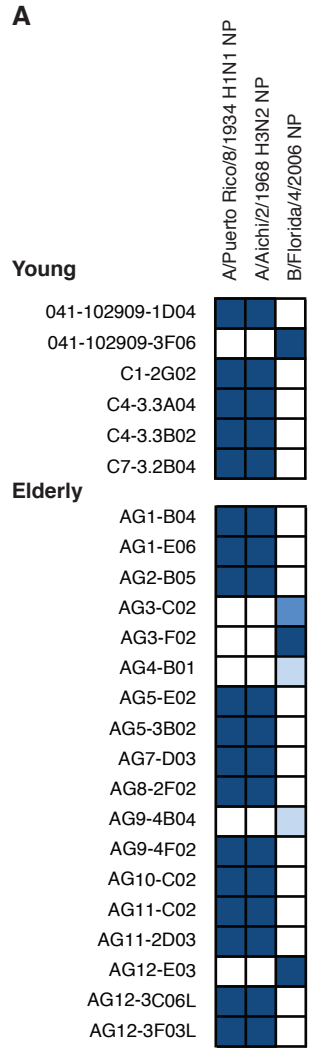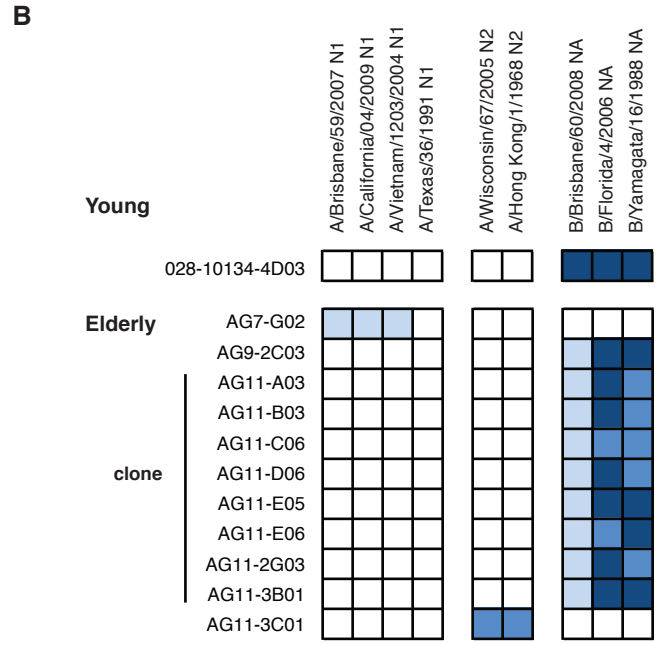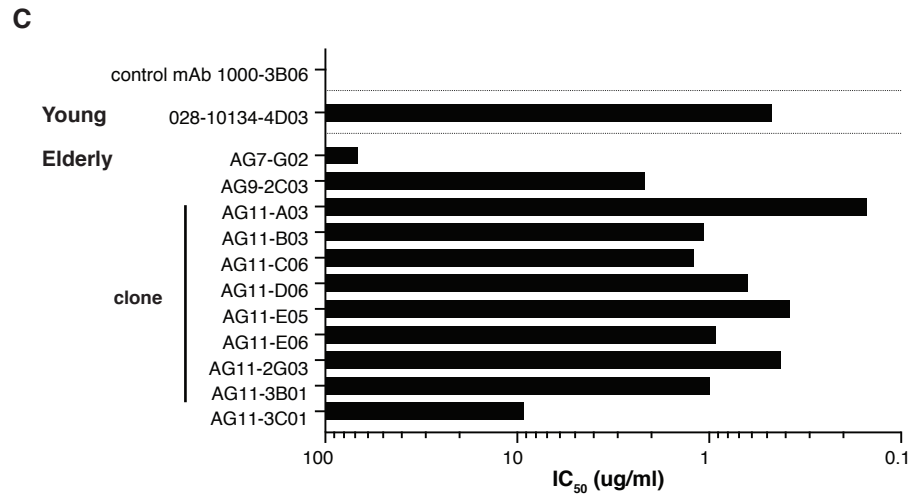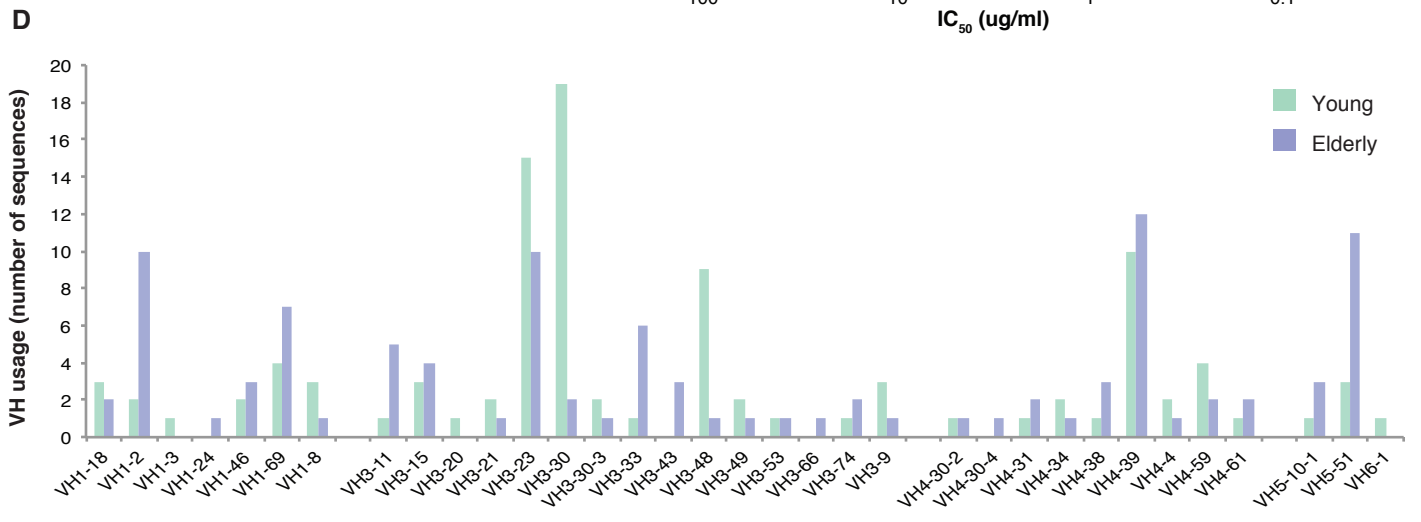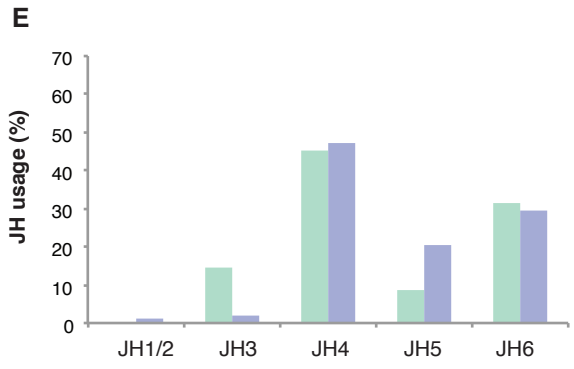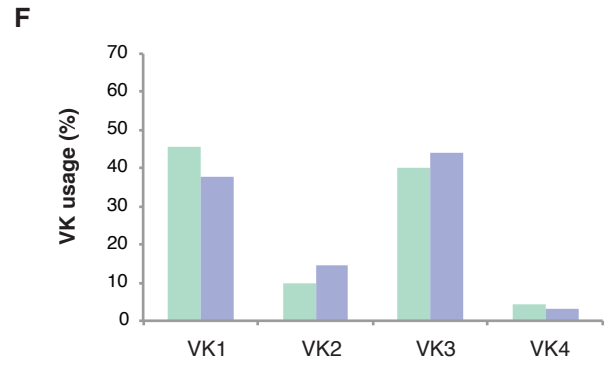

**Figure S4. Influenza-reactive antibodies from elderly individuals target conserved epitopes on NA and NP, Related to Figure 3.**

(A) Virus-positive non-HA reactive antibodies were tested for NP reactivity by ELISA. Strains used were A/Puerto Rico/8/1934 for H1N1, A/Aichi/2/1968 for H3N2, and B/Florida/4/2006. Shown is a heatmap of minimum positive concentration (in  $\mu\text{g/ml}$ ) for all NP-reactive antibodies. The intensity of blue correlates with the binding activity (lower antibody concentration to bind to NP proteins). White indicates no binding. The assays were performed in duplicate three times for each antibody.

(B) Virus-positive non-HA reactive antibodies were tested for NA reactivity by ELISA. A panel of N1, N2, and B NAs was used. Shown is a heatmap of minimum positive concentration (in  $\mu\text{g/ml}$ ) for all NA-reactive antibodies. The intensity of blue correlates with the binding activity (lower antibody concentration to bind to NA proteins). White indicates no binding. The assays were performed in duplicate three times for each antibody.

(C) NA-reactive antibodies were tested for NA enzymatic activity using a NA-*Star* assay. A/Brisbane/59/2007 H1N1, A/Wisconsin/67/2005, and B/Florida/04/2006 viruses were tested. Shown are the  $\text{IC}_{50}$  (in  $\mu\text{g/ml}$ ) for all NA-reactive antibodies. The  $\text{IC}_{50}$  were defined as the concentration at which 50% of the NA activity was inhibited. The control antibody (1000-3B06) was used (NA-reactive antibody that does not inhibit the enzymatic active site in the NA-*Star* assay). The experiment was done in duplicate three times.

(D-F) Molecular characteristics of the immunoglobulin genes coding for all influenza-reactive antibodies (young cohort,  $n=102$ ; elderly cohort,  $n=102$ ). Ig genes coding for each antibody was analyzed using V-Genes and IMGT to determine the (D) VH usage (E) JH usage and (F) the VK repertoire. In (D) are shown the total number of sequences for a particular VH gene. In (E) and (F) are shown the percentages of mAbs in each family.



**Table S1. Information on the subject's age, gender, year of vaccination, and type of vaccine received, Related to Figure 1.**

|                       | Subject ID | Age | Gender | Vaccine      | Type of vaccine    |
|-----------------------|------------|-----|--------|--------------|--------------------|
| <b>Young subjects</b> | 007        | 23  | F      | 2010-2011    | Fluvirin           |
|                       | 008        | 26  | F      | 2010-2011    | Fluvirin           |
|                       | 009        | 25  | F      | 2010-2011    | Fluvirin           |
|                       | 011        | 30  | M      | 2010-2011    | Fluvirin           |
|                       | 012        | 23  | M      | 2010-2011    | Fluvirin           |
|                       | 013        | 24  | F      | 2010-2011    | Fluvirin           |
|                       | 017        | 24  | M      | 2010-2011    | Fluvirin           |
|                       | 019        | 22  | F      | 2010-2011    | Fluvirin           |
|                       | 024        | 25  | M      | 2010-2011    | Fluvirin           |
|                       | 028        | 38  | M      | 2010-2011    | Fluvirin           |
|                       | 030        | 32  | F      | 2010-2011    | Fluvirin           |
|                       | 042        | 40  | M      | 2009-2010    | Fluzone            |
|                       | 037        | 26  | F      | 2010-2011    | Fluvirin           |
|                       | 034        | 39  | F      | 2009-2010    | Fluzone            |
|                       | 041        | 23  | M      | 2009-2010    | Fluzone            |
|                       | 045        | 24  | M      | pand. 2009   | Monovalent vaccine |
|                       | 047        | 23  | M      | pand. 2009   | Monovalent vaccine |
|                       | 051        | 43  | M      | pand. 2009   | Monovalent vaccine |
|                       | SFV005     | 60  | F      | pand. 2009   | Monovalent vaccine |
|                       | SFV009     | 31  | F      | pand. 2009   | Monovalent vaccine |
|                       | SFV015     | 48  | F      | pand. 2009   | Monovalent vaccine |
|                       | SFV018     | 58  | F      | pand. 2009   | Monovalent vaccine |
|                       | SFV019     | 48  | F      | pand. 2009   | Monovalent vaccine |
|                       | SFV020     | 64  | F      | pand. 2009   | Monovalent vaccine |
|                       | C1         | 44  | M      | Y1 2006-2007 | Fluvirin           |
|                       |            |     |        | Y2 2007-2008 | Fluvirin           |
|                       |            |     |        | Y3 2008-2009 | Fluzone            |
|                       | C2         | 30  | F      | Y2 2007-2008 | Fluvirin           |
|                       |            |     |        | Y3 2008-2009 | Fluzone            |
|                       | C3         | 29  | F      | Y2 2007-2008 | Fluvirin           |
|                       |            |     |        | Y3 2008-2009 | Fluzone            |
|                       | C4         | 43  | F      | Y2 2007-2008 | Fluvirin           |
|                       |            |     |        | Y3 2008-2009 | Fluzone            |
|                       | C5         | 39  | F      | Y1 2006-2007 | Fluvirin           |
|                       | C6         | 29  | F      | Y1 2006-2007 | Fluvirin           |
|                       |            |     |        | Y2 2007-2008 | Fluvirin           |

|                      |      |    |   |              |          |
|----------------------|------|----|---|--------------|----------|
|                      | C7   | 51 | M | Y3 2008-2009 | Fluzone  |
|                      | C8   | 47 | F | Y1 2006-2007 | Fluvirin |
|                      |      |    |   | Y2 2007-2008 | Fluvirin |
| <b>Aged subjects</b> | AG1  | 79 | M | 2007-2008    | Fluzone  |
|                      | AG2  | 77 | M | 2007-2008    | Fluzone  |
|                      | AG3  | 76 | F | 2007-2008    | Fluzone  |
|                      | AG4  | 71 | F | 2007-2008    | Fluzone  |
|                      | AG5  | 74 | F | 2009-2010    | Fluzone  |
|                      | AG6  | 78 | M | 2009-2010    | Fluzone  |
|                      | AG7  | 89 | F | 2009-2010    | Fluzone  |
|                      | AG8  | 71 | F | 2009-2010    | Fluzone  |
|                      | AG9  | 73 | M | 2009-2010    | Fluzone  |
|                      | AG10 | 71 | M | 2009-2010    | Fluzone  |
|                      | AG11 | 74 | F | 2009-2010    | Fluzone  |
|                      | AG12 | 77 | M | 2009-2010    | Fluzone  |
|                      | AG13 | 74 | M | 2009-2010    | Fluzone  |

The pandemic 2009 H1N1 vaccine was the monovalent vaccine from Sanofi Pasteur.

The elderly individuals received the TIV in 2007-2008 or 2009-2010 while the younger adults received the TIV from 2006-2007 to 2010-2011. Matching strains between both cohorts were used for further experiments and were: A/Solomon Islands/3/2006 and A/Brisbane/59/2007 for H1N1, A/Wisconsin/67/2005 and A/Brisbane/10/2007 for H3N2 and B/Malaysia/2506/2004 and B/Brisbane/60/2008 for B strains.

**Table S2. Numbers of influenza-reactive sequences, influenza-reactive clonal lineages and influenza-reactive monoclonal antibodies analyzed by subject, Related to Figure 1.**

|                       | Subject ID | Number of influenza-reactive VH sequences | Number of influenza-reactive clonal lineages | Number of influenza-reactive mAbs fully characterized |
|-----------------------|------------|-------------------------------------------|----------------------------------------------|-------------------------------------------------------|
| <b>Young subjects</b> | 007        | 42                                        | 6                                            |                                                       |
|                       | 008        | 36                                        | 3                                            | 2                                                     |
|                       | 009        | 62                                        | 7                                            |                                                       |
|                       | 011        | 26                                        | 4                                            | 1                                                     |
|                       | 012        | 34                                        | 7                                            |                                                       |
|                       | 013        | 48                                        | 5                                            |                                                       |
|                       | 017        | 48                                        | 5                                            | 2                                                     |
|                       | 019        | 30                                        | 2                                            | 6                                                     |
|                       | 024        | 28                                        | 3                                            | 6                                                     |
|                       | 028        |                                           |                                              | 4                                                     |
|                       | 030        | 21                                        | 1                                            |                                                       |
|                       | 042        | 45                                        | 6                                            | 4                                                     |
|                       | 037        | 6                                         | 1                                            | 2                                                     |
|                       | 034        | 51                                        | 8                                            | 11                                                    |
|                       | 041        | 25                                        | 2                                            | 8                                                     |
|                       | 045        | 29                                        | 3                                            |                                                       |
|                       | 047        | 26                                        | 3                                            |                                                       |
|                       | 051        | 31                                        | 9                                            |                                                       |
|                       | SFV005     | 4                                         | 1                                            |                                                       |
|                       | SFV009     | 13                                        | 1                                            |                                                       |
|                       | SFV015     | 49                                        | 4                                            | 12*                                                   |
|                       | SFV018     | 5                                         | 1                                            |                                                       |
|                       | SFV019     | 29                                        | 4                                            |                                                       |
|                       | SFV020     | 11                                        | 2                                            |                                                       |
|                       | C1 – Y1    | 52                                        | 8                                            | 16                                                    |
|                       | C1 – Y2    |                                           |                                              | 10                                                    |
|                       | C1 – Y3    |                                           |                                              | 2                                                     |
|                       | C2 – Y2    |                                           |                                              | 1                                                     |

|                      |         |    |   |    |
|----------------------|---------|----|---|----|
|                      | C2 – Y3 |    |   | 4  |
|                      | C3 – Y2 |    |   | 3  |
|                      | C3 – Y3 |    |   | 1  |
|                      | C4 – Y2 | 4  | 1 | 1  |
|                      | C4 – Y3 |    |   | 2  |
|                      | C5 – Y1 | 2  | 1 | 1  |
|                      | C6 – Y1 |    |   | 2  |
|                      | C6 – Y2 |    |   | 5  |
|                      | C7 – Y3 |    |   | 4  |
|                      | C8 – Y1 |    |   | 3  |
|                      | C8 – Y2 |    |   | 1  |
| <b>Aged subjects</b> | AG1     |    |   | 4  |
|                      | AG2     |    |   | 9  |
|                      | AG3     |    |   | 7  |
|                      | AG4     |    |   | 2  |
|                      | AG5     | 10 | 2 | 4  |
|                      | AG6     |    |   | 2  |
|                      | AG7     | 8  | 2 | 6  |
|                      | AG8     | 10 | 2 | 8  |
|                      | AG9     | 10 | 2 | 7  |
|                      | AG10    |    |   | 5  |
|                      | AG11    | 39 | 4 | 24 |
|                      | AG12    | 14 | 1 | 11 |
|                      | AG13    | 21 | 3 | 13 |

Out of the 32 young individuals recruited in our study, only 26 had clonally related sequences. Thus we performed the intraclonal mutation analysis with these 26 individuals.

\* Monoclonal antibodies from the donor SFV015 were used as an example of adaptation in figure 2 but they are not part of the 102 monoclonal antibodies fully characterized for the young individuals as they were induced by the pandemic 2009 H1N1 vaccine.
